# Supplementary material for: Berberine in Human Oncogenic Herpesvirus Infections and Their Linked Cancers
Source: MDPI journal article supplement (doi:10.3390/v13061014), 2021-05-28
Supplement: s1 [file s1]

ClinicalTrials.gov Search Results 05/21/2021

|   | Title                                                                                                                            | Status         | Study Results        | Conditions           | Interventions                                                                                              | Characteristics                | Population                                                                                      | Dates                                  | Locations                                                                                                                                                                                                                                                                                                                                                                                                                                                                                                                                                                                                                                                                                                                                                                                                                                                                                                                                                                         |
|---|----------------------------------------------------------------------------------------------------------------------------------|----------------|----------------------|----------------------|------------------------------------------------------------------------------------------------------------|--------------------------------|-------------------------------------------------------------------------------------------------|----------------------------------------|-----------------------------------------------------------------------------------------------------------------------------------------------------------------------------------------------------------------------------------------------------------------------------------------------------------------------------------------------------------------------------------------------------------------------------------------------------------------------------------------------------------------------------------------------------------------------------------------------------------------------------------------------------------------------------------------------------------------------------------------------------------------------------------------------------------------------------------------------------------------------------------------------------------------------------------------------------------------------------------|
| 1 | <a href="#">A Research of Berberine Hydrochloride to Prevent Colorectal Adenomas in Patients With Previous Colorectal Cancer</a> | Unknown status | No Results Available | •Colorectal Adenomas | •Drug: Berberine hydrochloride<br>•Drug: Placebo                                                           | Phase:<br>•Phase 2<br>•Phase 3 | Enrollment:<br>1000<br><br>Age:<br>18 Years to 80 Years (Adult, Older Adult)<br><br>Sex:<br>All | Study Completion:<br>March 1, 2021     | •Xijing Hospital of Digestive Disease, Xi'an, Shaanxi, China                                                                                                                                                                                                                                                                                                                                                                                                                                                                                                                                                                                                                                                                                                                                                                                                                                                                                                                      |
| 2 | <a href="#">Study of Berberine Hydrochloride in Prevention of Colorectal Adenomas Recurrence</a>                                 | Completed      | No Results Available | •Colorectal Adenoma  | •Drug: Berberine hydrochloride<br>•Drug: placebo                                                           | Phase:<br>•Phase 2<br>•Phase 3 | Enrollment:<br>1108<br><br>Age:<br>18 Years to 75 Years (Adult, Older Adult)<br><br>Sex:<br>All | Study Completion:<br>December 29, 2018 | •Department of Gastroenterology, the Seventh Medical Center of PLA General Hospital, Beijing, Beijing, China<br>•Department of Gastroenterology, Zhongshan Hospital, Xiamen University, Xiamen, Fujian, China<br>•Department of Gastroenterology, Nanfang Hospital, Southern Medical Univerisity, Guangdong, Guangzhou, China<br>•Division of Gastroenterology and Hepatology, The Affiliated DrumTower of Nanjing University Medical School, Nanjing, Jiangsu, China<br>•Division of Gastroenterology and Hepatology, Ren-Ji Hospital, Shanghai Jiao-Tong University School of Medicine, Shanghai Institute of Digestive Disease; Key Laboratory of Gastroenterology & Hepatology, Ministry of Health, Shanghai, Shanghai, China<br>•Department of Gastroenterology, the Shanghai Tenth People's Hospital, Tongji University, Shanghai, Shanghai, China<br>•Department of Gastroenterology and Hepatology, General Hospital, Tianjin Medical University, Tianjin, Tianjin, China |
| 3 | <a href="#">Primary Chemoprevention of Familial Adenomatous Polyposis With Berberine Hydrochloride</a>                           | Recruiting     | No Results Available | •Colorectal Adenomas | •Drug: 100mg Berberine hydrochloride<br>•Drug: 300mg Berberine hydrochloride<br>•Drug: Placebo Oral Tablet | Phase:<br>•Phase 2<br>•Phase 3 | Enrollment:<br>100<br><br>Age:<br>18 Years to 65 Years (Adult, Older Adult)<br><br>Sex:<br>All  | Study Completion:<br>December 31, 2020 | •Xijing Hospital of Digestive Disease, Xi'an, Shaanxi, China                                                                                                                                                                                                                                                                                                                                                                                                                                                                                                                                                                                                                                                                                                                                                                                                                                                                                                                      |

|   | Title                                                                                                               | Status                 | Study Results        | Conditions          | Interventions                                                                                                | Characteristics   | Population                                                                                        | Dates | Locations                                                                                                                    |
|---|---------------------------------------------------------------------------------------------------------------------|------------------------|----------------------|---------------------|--------------------------------------------------------------------------------------------------------------|-------------------|---------------------------------------------------------------------------------------------------|-------|------------------------------------------------------------------------------------------------------------------------------|
| 4 | <a href="#">Berberine Chloride in Preventing Colorectal Cancer in Patients With Ulcerative Colitis in Remission</a> | Active, not recruiting | No Results Available | •Ulcerative Colitis | •Drug: Berberine Chloride<br><br>•Other: Laboratory Biomarker Analysis<br><br>•Other: Placebo Administration | Phase:<br>Phase 1 | Enrollment:<br>18<br><hr/> Age:<br>18 Years to 70 Years (Adult, Older Adult)<br><hr/> Sex:<br>All |       | •Northwestern University, Chicago, Illinois, United States<br><br>•Fourth Military Medical University, Xi'an, Shaanxi, China |
